# Supplementary material for: Conformational exchange of aromatic side chains characterized by L-optimized TROSY-selected 13C CPMG relaxation dispersion
Source: PubMed Central journal article supplement (PMC3427480; doi:10.1007/s10858-012-9656-z), 2012-07-26
Supplement: 10858_2012_9656_MOESM1_ESM.pdf [file 10858_2012_9656_MOESM1_ESM.pdf]

## **Supporting Information**

### **Conformational Exchange of Aromatic Side Chains Characterized by L-optimized TROSY-Selected $^{13}\text{C}$ CPMG Relaxation Dispersion**

Ulrich Weininger, Michal Respondek, and Mikael Akke\*

Department of Biophysical Chemistry, Center for Molecular Protein Science, Lund University, P.O. Box 124, SE-22100 Lund, Sweden

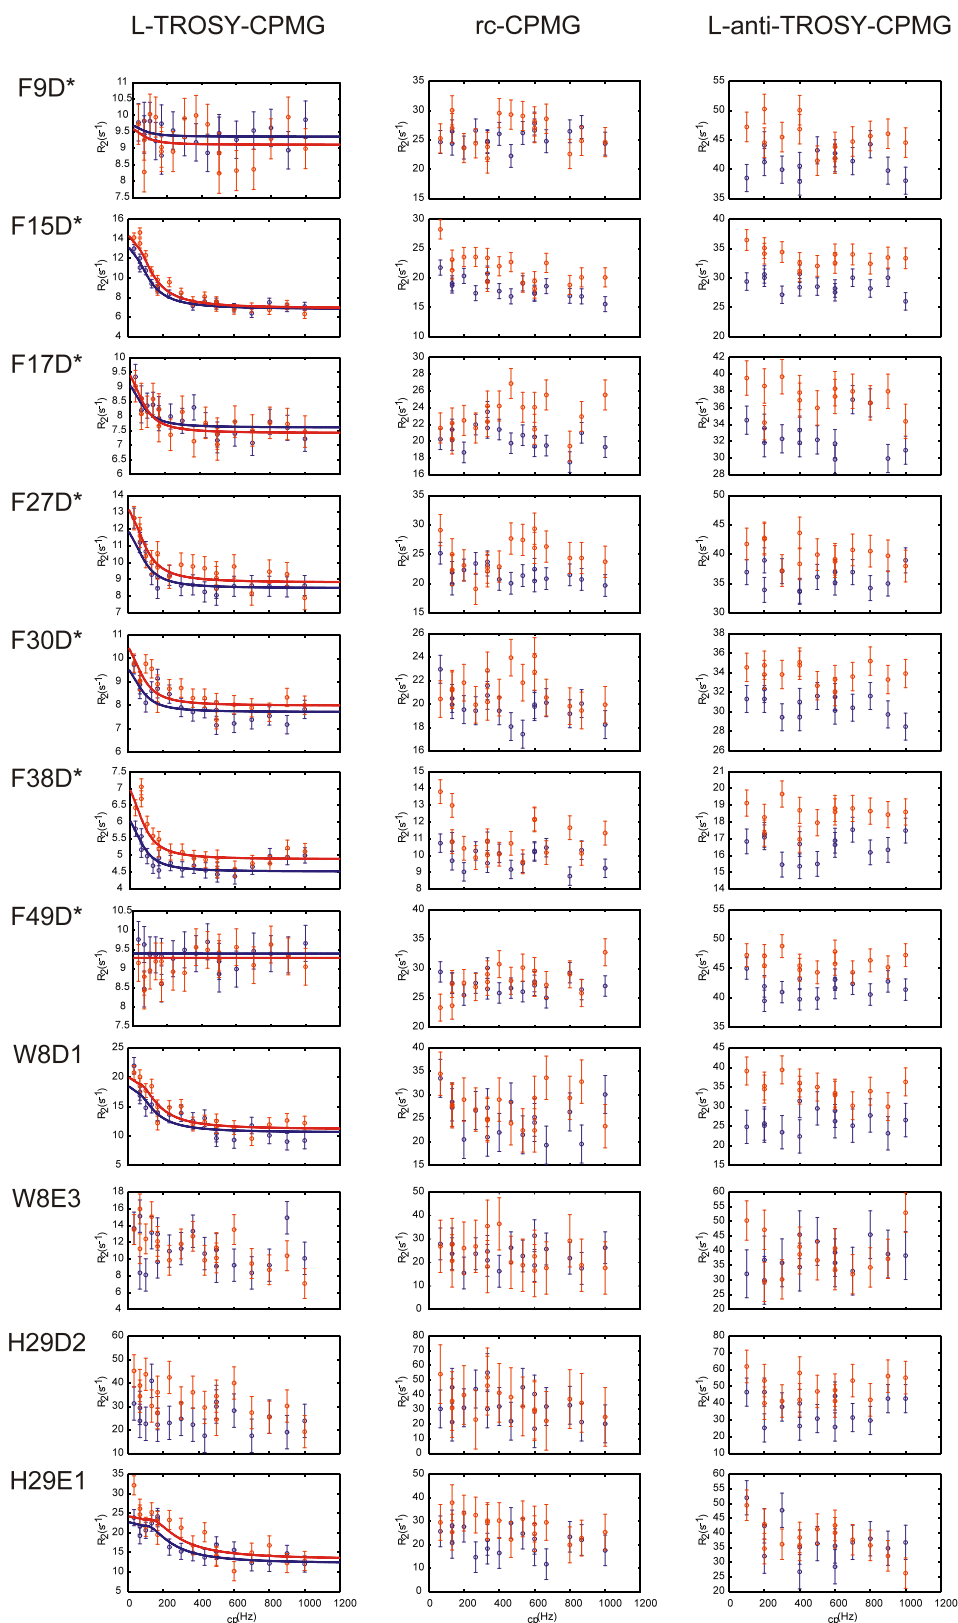

**SI Figure 1.** All obtained  $^{13}\text{C}$  aromatic CPMG relaxation dispersion profiles in three different versions acquired on a 0.4 mM sample of CspB in 10 mM HEPES pH 7.0 at 25 °C and static magnetic field strengths of 11.7 T (blue) and 14.1 T (red). The solid lines in the L-TROSY variant represent global fits of the folding–unfolding model to the experimental data.

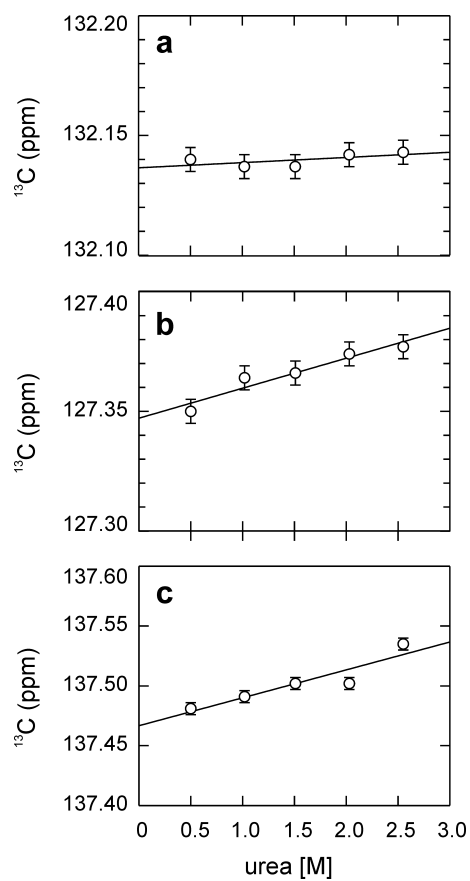

**SI Figure 2.** Urea dependence of the  $^{13}\text{C}$  chemical shifts of the unfolded state of CspB at 25°C monitored by  $^1\text{H}$ - $^{13}\text{C}$  HSQC. (a) Phe D\*, (b) Trp D1, (c) His E1.
